# Supplementary material for: Bacillus subtilis biofilms characterized as hydrogels. Insights on water uptake and water binding in biofilms
Source: Royal Society of Chemistry journal article supplement (doi:10.1039/d0sm00581a), 2020-01-01
Supplement: d0sm00581a1.pdf [file d0sm00581a1.pdf]

## ***Bacillus subtilis* biofilms characterized as hydrogels. Insights on water uptake and water binding in biofilms**

Ido Nir<sup>a</sup>, Amir Lybman<sup>a</sup>, Shahar Hayet<sup>b</sup>, David N Azulay<sup>b</sup>, Mnar Ghayeb<sup>b</sup>, Sajeda Liddawieh<sup>b</sup> and Liraz Chai<sup>b\*</sup>

<sup>a</sup> *The Israel Institute for Biological Research*

<sup>b</sup> *Institute of Chemistry, the Hebrew University of Jerusalem and The center for Nanoscience and Nanotechnology, Edmond J. Safra Campus, Jerusalem 91904, Israel*

*\* To whom correspondence should be addressed: Dr. Liraz Chai, Institute of Chemistry, The Hebrew University of Jerusalem, Edmond J. Safra campus, Jerusalem 91904, Israel. Telephone: +972-2-6585303, Fax. +972-2-5660425. Email. [Liraz.chai@mail.huji.ac.il](mailto:Liraz.chai@mail.huji.ac.il)*

|                                      | <b>Na</b> | <b>Mg</b> | <b>K</b> | <b>Ca</b> | <b>Mn</b> | <b>Fe</b> | <b>Zn</b> |
|--------------------------------------|-----------|-----------|----------|-----------|-----------|-----------|-----------|
| <b>WT</b>                            | 1190      | 460       | 4844     | 612       | 46        | 1.2       | 2.7       |
| <b>WT error</b>                      | 150       | 150       | 2042     | 190       | 13        | 0.8       | 0.7       |
| <b><math>\Delta</math>eps</b>        | 1640      | 501       | 3542     | 570       | 43        | 0.4       | 3.5       |
| <b><math>\Delta</math>eps error</b>  | 92        | 60        | 530      | 40        | 4         | 0.1       | 0.2       |
| <b><math>\Delta</math>tasA</b>       | 1364      | 369       | 3220     | 410       | 27        | 0.4       | 2.6       |
| <b><math>\Delta</math>tasA error</b> | 260       | 110       | 850      | 150       | 10        | 0.2       | 2.0       |

Table S1. ICP results showing the abundance of salts in biofilms made by WT and matrix mutants. The elemental concentration (in ppb) is normalized by the biofilms' weight (in mg), which makes the units in the table ppb/mg. The results are an average of three different biofilms of each strain.

To compare with literature values reported in M/cell, e.g. reference 36 in the manuscript, a conversion factor  $9 \cdot 10^6$  cell/mg can be used (see Experimental section for more detail).

|                                      | <b>Na</b> | <b>Mg</b> | <b>K</b> | <b>Ca</b> | <b>Mn</b> | <b>Fe</b> | <b>Zn</b> |
|--------------------------------------|-----------|-----------|----------|-----------|-----------|-----------|-----------|
| <b>WT</b>                            | 320       | 260       | 905      | 504       | 30        | 0.6       | 1.5       |
| <b>WT error</b>                      | 20        | 20        | 85       | 125       | 10        | 0.2       | 0.3       |
| <b><math>\Delta</math>eps</b>        | 526       | 406       | 465      | 822       | 23        | 0.23      | 5         |
| <b><math>\Delta</math>eps error</b>  | 81        | 50        | 150      | 145       | 5         | 0.19      | 2         |
| <b><math>\Delta</math>tasA</b>       | 263       | 144       | 280      | 260       | 8         | 0.16      | 0.95      |
| <b><math>\Delta</math>tasA error</b> | 20        | 20        | 170      | 37        | 2         | 0.07      | 0.02      |

Table S2. ICP results showing the abundance of salts in biofilms made by WT and matrix mutants that grew on agar-MSgg and transferred to agar-water plates for three days. The elemental concentration (in ppb) is normalized by the biofilms' weight (in mg) and divided by the elemental concentration in an agar-agar piece, normalized by its weight. The results are an average of three different biofilms of each strain.

|                         | <b>Na</b> | <b>Mg</b> | <b>K</b> | <b>Ca</b> | <b>Mn</b> | <b>Fe</b> | <b>Zn</b> |
|-------------------------|-----------|-----------|----------|-----------|-----------|-----------|-----------|
| <b>Agar-MSgg</b>        | 890       | 35        | 227      | 51        | 1.72      | 0.56      | 0.59      |
| <b>Agar-MSgg error</b>  | 140       | 4         | 51       | 10        | 0.23      | 0.28      | 0.14      |
| <b>Agar-water</b>       | 90        | 6         | 6.7      | 25.5      | 0.165     | 0.59      | 0.47      |
| <b>Aga-/water error</b> | 15        | 1         | 1.6      | 5.6       | 0.092     | 0.53      | 0.11      |

Table S3. ICP results showing the abundance of salts in agar-MSgg and in agar-water. Concentration values (in ppb) are normalized by the sample's weight (in mg), therefore the units are ppb/mg.

Figure S1.

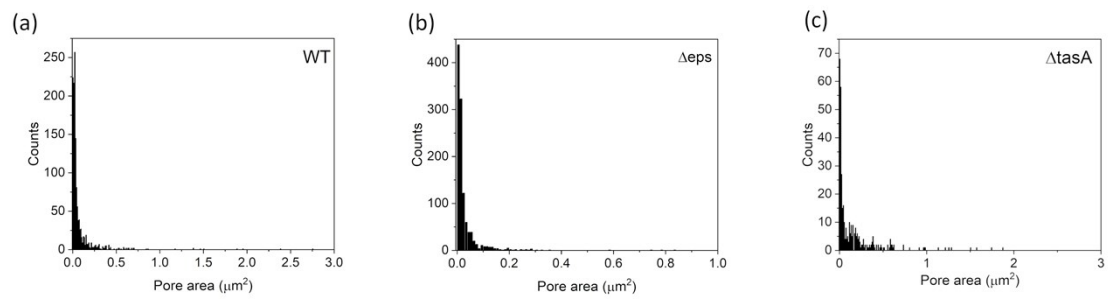

Figure S1. Pore size distribution in biofilms (WT,  $\Delta\text{eps}$ ,  $\Delta\text{tasA}$ ), plotted on a full scale.
